# Supplementary material
Source: Royal Society of Chemistry journal article supplement (doi:10.1039/d6ce00111d)
Supplement: d6ce00111d1.pdf [file d6ce00111d1.pdf]

# pH-Regulated Structural Evolution Enables Excitation-Dependent Tunable and Quasi-White-Light Emission in Tetrazole-Based d<sup>10</sup> Coordination Polymers

Yanqing Guo<sup>a†</sup>, Haitao Li<sup>b†</sup>, Lu Liu<sup>a\*</sup>, and Rong Li<sup>b\*</sup>

<sup>a</sup>North University of China, Taiyuan 030051, P. R. China

<sup>b</sup>School of Materials Science & Engineering, Hubei University, Wuhan 430062, P. R. China

**Table S1.** XRD Crystallographic Data for 1-3

| Compound                                                                 | 1                                                                  | 2                                                                    | 3                                                                 |
|--------------------------------------------------------------------------|--------------------------------------------------------------------|----------------------------------------------------------------------|-------------------------------------------------------------------|
| CCDC                                                                     | 1975825                                                            | 1504873                                                              | 1504881                                                           |
| Formula                                                                  | C <sub>21</sub> H <sub>14</sub> CdN <sub>6</sub><br>O <sub>5</sub> | C <sub>28</sub> H <sub>22</sub> CdN <sub>10</sub><br>O <sub>10</sub> | C <sub>30</sub> H <sub>20</sub> N <sub>10</sub> O <sub>9</sub> Zn |
| Formula mass                                                             | 542.78                                                             | 770.96                                                               | 729.93                                                            |
| Crystal system                                                           | Monoclinic                                                         | Triclinic                                                            | Triclinic                                                         |
| Space group                                                              | <i>C2/c</i>                                                        | <i>P-1</i>                                                           | <i>P-1</i>                                                        |
| <i>a</i> /Å                                                              | 31.1727(10)                                                        | 6.536(3)                                                             | 10.142(2)                                                         |
| <i>b</i> /Å                                                              | 6.8735(3)                                                          | 8.817(4)                                                             | 11.581(3)                                                         |
| <i>c</i> /Å                                                              | 19.5674(7)                                                         | 13.687(7)                                                            | 13.244(3)                                                         |
| $\alpha$ /°                                                              | 104.442(3)                                                         | 93.640(6)                                                            | 84.565(15)                                                        |
| $\beta$ /°                                                               | 98.575(4)                                                          | 97.775(4)                                                            | 76.115(11)                                                        |
| $\gamma$ /°                                                              | 104.442(3)                                                         | 98.916(8)                                                            | 77.104(15)                                                        |
| <i>V</i> /Å <sup>3</sup>                                                 | 4060.14(27)                                                        | 769.18(63)                                                           | 1470.63(59)                                                       |
| <i>Z</i>                                                                 | 8                                                                  | 1                                                                    | 2                                                                 |
| $\rho_{\text{calc}}$ g/cm <sup>3</sup>                                   | 1.776                                                              | 1.664                                                                | 1.648                                                             |
| $\mu$ /mm <sup>-1</sup>                                                  | 1.125                                                              | 0.785                                                                | 0.912                                                             |
| <i>F</i> (000)                                                           | 2160                                                               | 388                                                                  | 1789                                                              |
| Reflections collected                                                    | 17746                                                              | 6856                                                                 | 13278                                                             |
| <i>wR</i> <sub>2</sub> <sup>b</sup> (all data)                           | 0.053                                                              | 0.070                                                                | 0.179                                                             |
| <i>R</i> <sub>1</sub> <sup>a</sup> [ <i>I</i> > 2 <i>s</i> ( <i>I</i> )] | 0.020                                                              | 0.028                                                                | 0.034                                                             |
| <i>R</i> <sub>int</sub>                                                  | 0.0228                                                             | 0.0286                                                               | 0.0737                                                            |

<sup>a</sup>*R*<sub>1</sub> =  $\sum ||F_o| - |F_c|| / \sum |F_o|$ . <sup>b</sup>*wR*<sub>2</sub> =  $[\sum w(F_o^2 - F_c^2)^2] / [\sum w(F_o^2)^2]^{1/2}$ .

**Table S2.** Selected lengths (Å) and angles (°) for the as-synthesized crystals of **1**.

|                 |            |               |            |
|-----------------|------------|---------------|------------|
| Cd1–O13         | 2.3656(11) | Cd1–N12       | 2.4168(13) |
| Cd1–N13#1       | 2.3683(12) | Cd1–O1W       | 2.4295(13) |
| Cd1–N16#2       | 2.4006(13) | Cd1–O14       | 2.5605(11) |
| Cd1–N11         | 2.4023(12) | N12–Cd1–O1W   | 84.03(5)   |
| O13–Cd1–N13#1   | 104.48(4)  | O13–Cd1–N16#2 | 84.30(4)   |
| N13#1–Cd1–N16#2 | 163.01(4)  | O13–Cd1–N11   | 78.69(4)   |
| N13#1–Cd1–N11   | 93.48(4)   | N16#2–Cd1–N11 | 102.59(4)  |
| O13–Cd1–N12     | 146.86(4)  | N13#1–Cd1–N12 | 86.60(5)   |
| O13–Cd1–O14     | 52.60(3)   | N16#2–Cd1–N12 | 93.84(4)   |
| N13#1–Cd1–O14   | 92.41(5)   | N11–Cd1–N12   | 69.41(5)   |
| N16#2–Cd1–O14   | 81.33(4)   | O13–Cd1–O1W   | 127.93(4)  |
| N11–Cd1–O14     | 130.79(4)  | N13#1–Cd1–O1W | 82.15(4)   |
| N12–Cd1–O14     | 159.77(4)  | N16#2–Cd1–O1W | 81.02(4)   |
| N11–Cd1–O1W     | 153.32(5)  | O1W–Cd1–O14   | 75.83(4)   |

**Symmetry codes for 1:** #1  $-x + 1/2, -y + 3/2, -z + 1$  ; #2  $-x + 1/2, -y + 1/2, -z + 1$ .

**Table S3.** Selected lengths (Å) and angles (°) for the as-synthesized crystals of **2**.

|                 |            |                 |            |
|-----------------|------------|-----------------|------------|
| Cd1–N22#1       | 2.3024(19) | Cd1–O1W         | 2.3238(17) |
| Cd1–N22         | 2.3025(19) | Cd1–N11         | 2.3994(19) |
| Cd1–O1W#1       | 2.3238(18) | Cd1–N11#1       | 2.3994(19) |
| N22#1–Cd1–N11#1 | 93.40 (7)  | N22#1–Cd1–N11   | 86.60 (7)  |
| N22–Cd1–N11#1   | 86.60 (7)  | N22–Cd1–N11     | 93.40 (7)  |
| O1W#1–Cd1–N11#1 | 89.72 (7)  | O1W#1–Cd1–N11   | 90.28 (7)  |
| O1W–Cd1–N11#1   | 90.28 (7)  | O1W—Cd1—N11     | 89.72 (7)  |
| N11–Cd1–N11#1   | 180.0      | N22#1–Cd1–N22   | 180.0      |
| N22#1–Cd1–O1W   | 90.59 (7)  | N22#1–Cd1–O1W#1 | 89.41 (7)  |
| N22–Cd1–O1W     | 89.41 (7)  | N22–Cd1–O1W#1   | 90.59 (7)  |
| O1W#1–Cd1–O1W   | 180.00 (8) |                 |            |

**Symmetry codes for 2:** #1  $-x, -y + 1, -z + 1$ ; #2  $-x + 1, -y, -z + 1$ .

**Table S4.** Selected lengths (Å) and angles (°) for the as-synthesized crystals of **3**.

|             |            |             |            |
|-------------|------------|-------------|------------|
| Zn1–N43     | 2.000(3)   | Zn1–O1W     | 2.122(3)   |
| Zn1–N32     | 2.027(3)   | Zn1–N11     | 2.179(3)   |
| Zn1–N21     | 2.071(3)   |             |            |
| N32–Zn1–N11 | 90.05(13)  | N21–Zn1–O1W | 89.70(13)  |
| N21–Zn1–N11 | 78.18(15)  | N43–Zn1–N11 | 94.63(13)  |
| O1W–Zn1–N11 | 166.75(14) | N43–Zn1–N32 | 112.27(13) |
| N43–Zn1–O1W | 95.67(11)  | N43–Zn1–N21 | 116.96(12) |
| N32–Zn1–O1W | 93.74(12)  | N32–Zn1–N21 | 130.02(12) |

**Symmetry codes for 3:** #1  $-x + 1/2, -y + 3/2, -z + 1$ , #2  $-x + 1/2, -y + 1/2, -z + 1$ .

**Table S5.** Summary of SHAPE analysis for compound **1**.

| Metal | label         | shape                                   | symmetry                   | Distortion( $\tau$ ) |
|-------|---------------|-----------------------------------------|----------------------------|----------------------|
|       | HP-7          | Heptagon                                | $D_{7h}$                   | 31.886               |
|       | HPY-7         | Hexagonal pyramid                       | $C_{6v}$                   | 20.086               |
|       | <b>PBPY-7</b> | <b>Pentagonal bipyramid</b>             | <b><math>D_{5h}</math></b> | <b>1.916</b>         |
| Cd1   | COC-7         | Capped octahedron                       | $C_{3v}$                   | 5.877                |
|       | CTPR-7        | Capped trigonal prism                   | $C_{2v}$                   | 4.147                |
|       | JPBPY-7       | Johnson pentagonal bipyramid J13        | $D_{5h}$                   | 5.055                |
|       | JETPY-7       | Johnson elongated triangular pyramid J7 | $C_{3v}$                   | 19.941               |

**Table S6.** Summary of SHAPE analysis for compound **2**.

| Metal | label         | shape                                         | symmetry              | Distortion( $\tau$ ) |
|-------|---------------|-----------------------------------------------|-----------------------|----------------------|
|       | OP-8          | Octagon                                       | D <sub>8h</sub>       | 28.687               |
|       | HPY-8         | Heptagonal pyramid                            | C <sub>7v</sub>       | 25.853               |
|       | <b>HBPY-8</b> | <b>Hexagonal bipyramid</b>                    | <b>D<sub>6h</sub></b> | <b>7.894</b>         |
|       | CU-8          | Cube                                          | O <sub>h</sub>        | 14.430               |
| Cd    | SAPR-8        | Square antiprism                              | D <sub>4d</sub>       | 22.786               |
|       | TDD-8         | Triangular dodecahedron                       | D <sub>2d</sub>       | 20.7773              |
|       | JGBF-8        | Johnson gyrobifastigium J26                   | D <sub>2d</sub>       | 12.965               |
|       | JETBPY-8      | Johnson elongated triangular bipyramid<br>J14 | D <sub>3h</sub>       | 22.594               |

**Table S7.** Summary of SHAPE analysis for compound **3**.

| Metal | label         | shape                          | symmetry              | Distortion( $\tau$ ) |
|-------|---------------|--------------------------------|-----------------------|----------------------|
|       | PP-5          | Pentagon                       | D <sub>5h</sub>       | 32.286               |
|       | vOC-5         | Vacant octahedron              | C <sub>4v</sub>       | 4.312                |
| Zn1   | <b>TBPY-5</b> | <b>Trigonal bipyramid</b>      | <b>D<sub>3h</sub></b> | <b>1.029</b>         |
|       | SPY-5         | Spherical square pyramid       | C <sub>4v</sub>       | 2.739                |
|       | JTBPY-6       | Johnson trigonal bipyramid J12 | D <sub>3h</sub>       | 3.058                |

**Table S8.** Quantitative comparison of the principal  $\pi$ - $\pi$  interactions in compounds **1–3**, derived from the PLATON analysis.

| Cg(I)-Cg(J)       | Cg-Cg (Å) | Alpha (°) | CgI_Perp (Å) | Slippage (Å) |
|-------------------|-----------|-----------|--------------|--------------|
| <b>Compound 1</b> |           |           |              |              |
| Cg(R3)-Cg(R3)     | 3.563     | 0.00      | 3.330        | 1.267        |
| Cg(R1)-Cg(R5)     | 3.724     | 13.25     | 3.327        | 2.000        |
| Cg(R3)-Cg(R4)     | 3.808     | 0.54      | 3.333        | 1.831        |
| <b>Compound 2</b> |           |           |              |              |
| Cg(R2)-Cg(R2)     | 4.215     | 0.00      | 3.947        | 1.478        |
| Cg(R3)-Cg(R3)     | 3.795     | 0.00      | 3.385        | 1.715        |
| <b>Compound 3</b> |           |           |              |              |
| Cg(R4)-Cg(R4)     | 3.596     | 0.00      | 3.343        | 1.325        |
| Cg(R1)-Cg(R3)     | 3.634     | 9.07      | 3.535        | 0.567        |
| Cg(R2)-Cg(R4)     | 3.666     | 1.05      | 3.370        | 1.427        |
| Cg(R6)-Cg(R6)     | 3.693     | 0.00      | 3.567        | 0.957        |
| Cg(R6)-Cg(R7)     | 3.856     | 2.78      | 3.545        | 1.434        |

**Notes:** Cg(I)/Cg(J) denote the centroids of the interacting rings. Alpha is the dihedral angle between the ring planes. Cg-Cg is the centroid-to-centroid distance. CgI\_Perp is the perpendicular distance from Cg(I) to the plane of ring J. Slippage is the distance between Cg(I) and Perpendicular Projection of Cg(J) on Ring I (Ang).

Ring labels used here: **Compound 1:** R1 benzene, R3 pyridyl, R4 benzene, R5 pyridyl; **Compound 2:** R2 benzene, R3 pyridyl; **Compound 3:** R1 tetrazole, R2/R4/R6 benzene, R3 tetrazole, R7 pyridyl.

**Table S9.** The main hydrogen bonds for compound **1-3**

| <b>Compound 1</b> |                |           |           |            |            |
|-------------------|----------------|-----------|-----------|------------|------------|
| Type              | D–H···A        | D–H (Å)   | H···A (Å) | D···A (Å)  | <(DHA) (°) |
|                   | O11–H1···O14   | 0.81(2)   | 1.74(2)   | 2.5473(18) | 177(2)     |
|                   | O1W–H1WA···O12 | 0.84(2)   | 2.12(2)   | 2.9256(18) | 161(2)     |
| Intra             | O1W–H1WB···N15 | 0.842(12) | 2.211(15) | 2.8728(18) | 136(2)     |
| Intra             | C11–H11A···O13 | 0.93      | 2.32      | 2.9711(19) | 126        |
| Intra             | C22–H22A···O1W | 0.93      | 2.58      | 3.224(2)   | 127        |
| <b>Compound 2</b> |                |           |           |            |            |
| Type              | D–H···A        | D–H (Å)   | H···A (Å) | D···A (Å)  | <(DHA) (°) |
|                   | O1W–H1WA···N23 | 0.837(16) | 2.14(2)   | 2.914(3)   | 153(2)     |
|                   | O1W–H1WB···O24 | 0.834(16) | 1.889(16) | 2.717(3)   | 172(3)     |
|                   | O23–H27A···N24 | 0.74(4)   | 1.95(4)   | 2.653(3)   | 158(4)     |
|                   | O22–H28A···O21 | 1.05(9)   | 1.54(9)   | 2.586(3)   | 174(9)     |
| Intra             | C22–H22A···O22 | 0.93      | 2.43      | 2.740(3)   | 100        |
| Intra             | C22–H22A···N21 | 0.93      | 2.52      | 2.847(3)   | 101        |
|                   | C24–H24A···O23 | 0.93      | 2.40      | 3.283(3)   | 160        |

| Compound 3     |         |           |           |           |            |
|----------------|---------|-----------|-----------|-----------|------------|
| Type           | D–H···A | D–H (Å)   | H···A (Å) | D···A (Å) | <(DHA) (°) |
| O3W–3WA...O1W  |         | 0.846(17) | 2.556(17) | 3.129(7)  | 125.9(15)  |
| O3W–H3WB...O24 |         | 0.849(13) | 2.28(3)   | 2.803(6)  | 120(2)     |
| O3W–H3WB...N12 |         | 0.849(13) | 2.124(17) | 2.873(6)  | 147(3)     |
| O2W–H2WA...O4W |         | 0.85(3)   | 2.275(18) | 2.853(9)  | 126(3)     |
| O2W–H2WB...O4W |         | 0.848(18) | 2.47(3)   | 3.014(9)  | 122(2)     |
| O1W–H1WB...O3W |         | 0.850(17) | 2.36(2)   | 3.129(7)  | 152(2)     |
| O4W–H4WA...O24 |         | 0.85(3)   | 1.99(3)   | 2.827(8)  | 168(4)     |
| O4W–H4WB...O5W |         | 0.85(2)   | 2.52(3)   | 2.939(11) | 111(3)     |
| O6W–H6WA...O5W |         | 0.849(18) | 2.04(2)   | 2.829(13) | 155(3)     |
| O5W–H5WA...O23 |         | 0.849(19) | 1.962(19) | 2.757(9)  | 156(2)     |
| C11–H11A...N23 |         | 0.93      | 2.46      | 3.381(7)  | 172        |
| C34–H34A...O3W |         | 0.93      | 2.59      | 3.127(7)  | 117        |

**Table S10.** The corresponding CIE coordinates (x, y), CRI and CCT values for **1** under different excitation wavelengths.

| $\lambda_{\text{ex}}$ / nm | CIE (x, y)    | CRI | CCT  |
|----------------------------|---------------|-----|------|
| 300                        | (0.219 0.232) | 86  | 3349 |

|     |               |    |      |
|-----|---------------|----|------|
| 320 | (0.232 0.212) | 93 | 5863 |
| 340 | (0.236 0.222) | 94 | 3841 |
| 360 | (0.247 0.246) | 92 | 1649 |
| 380 | (0.263 0.313) | 81 | 2784 |
| 400 | (0.284 0.366) | 75 | 3944 |

**Table S11.** Fluorescence decay parameters of compound 1-3.

| Compound | $\lambda_{em}$ / nm | $\tau_1$ (ns) | $A_1$ | $\tau_2$ (ns) | $A_2$ | $\tau$ (ns) |
|----------|---------------------|---------------|-------|---------------|-------|-------------|
| <b>1</b> | 500                 | 1.39          | 0.52  | 7.24          | 0.48  | 4.2         |
| <b>2</b> | 485                 | 6.82          | 0.51  | 15.89         | 0.49  | 11.3        |
| <b>3</b> | 500                 | 3.45          | 0.42  | 10.20         | 0.58  | 7.37        |

The lifetime data were processed according to the literature method.<sup>1</sup> Decay in the fluorescence intensity ( $I$ ) with time ( $\tau$ ) was fitted by a double-exponential function:  $I = A_1 \exp(-t / \tau_1) + A_2 \exp(-t / \tau_2)$  (1), where  $\tau_1$  and  $\tau_2$  are the lifetimes of shorter- and longer-lived species, respectively, and  $A_1$  and  $A_2$  are their respective amplitudes. The weighted mean lifetime ( $\langle \tau \rangle$ ) was calculated according to Equation (2):  $\langle \tau \rangle = (A_1 \tau_1 + A_2 \tau_2) / (A_1 + A_2)$ .

(1). Qin, A.; Jim, C. K.; Tang, Y.; Lam, J. W.; Liu, J.; Mahtab, F.; Gao, P.; Tang, B. Z. *J. Phys. Chem. B*, 2008, **112**, 9281–9288.

**Table S12.** Solid-state photoluminescence quantum yields (PLQYs) of compounds 1–3 measured under 400 nm excitation.

| Compound | Excitation wavelength / nm | PLQY/% |
|----------|----------------------------|--------|
| <b>1</b> | 400                        | 5.53   |
| <b>2</b> | 400                        | 6.65   |
| <b>3</b> | 400                        | 5.21   |

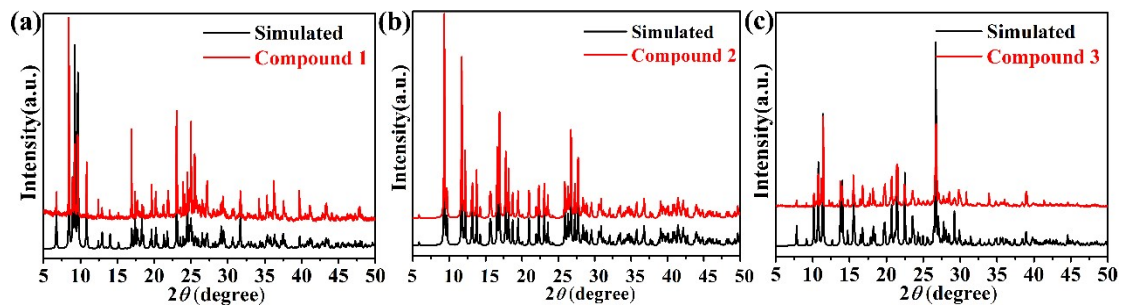

**Figure S1.** Comparison of experimental PXRD patterns for compound **1** (a), compound **2** (b) and compound **3** (c) to their simulated ones from single-crystal X-ray data.

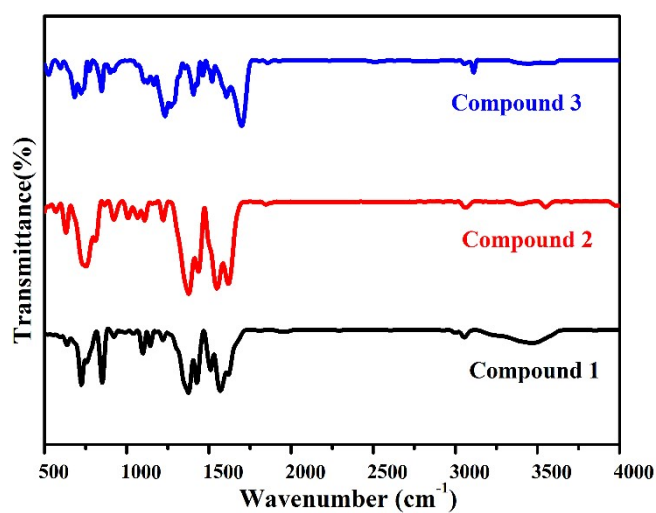

**Figure S2.** FT-IR curves for compound **1-3**

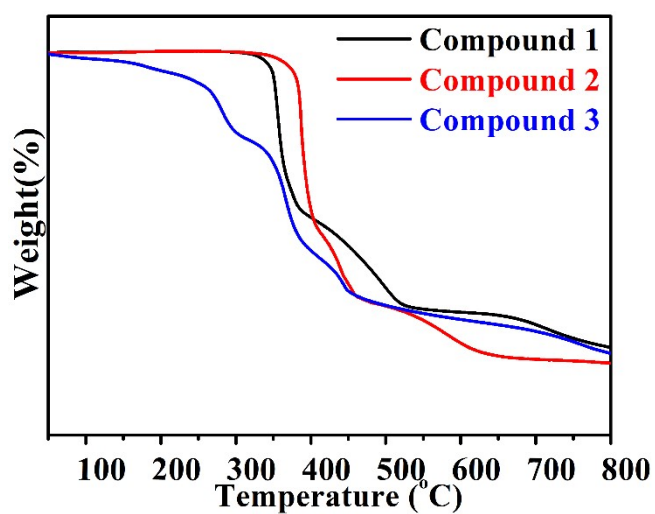

**Figure S3.** TGA curves for compound **1-3**.

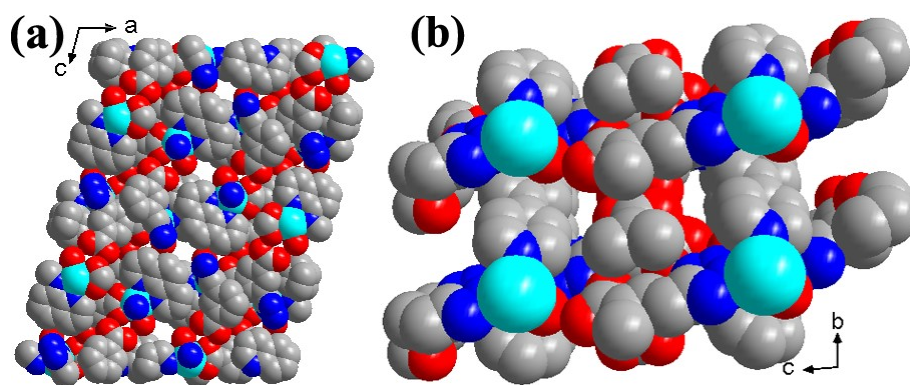

Figure S4. 3D supramolecular framework of compound 1 (a) and compound 2 (b).

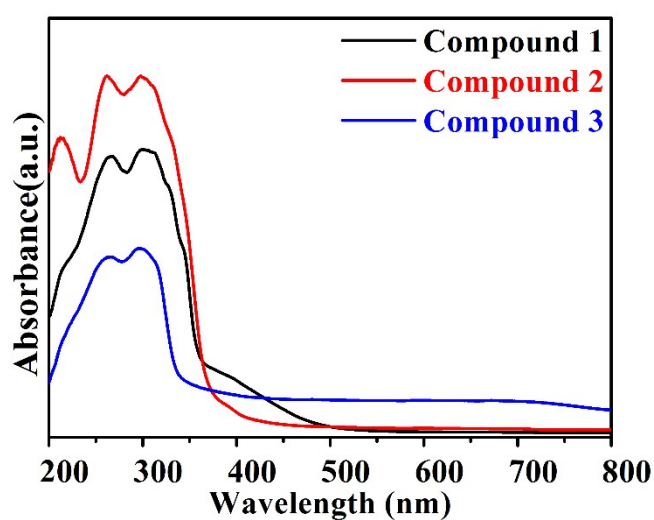

Figure S5. The solid-state UV-vis absorption spectra of compound 1–3 at room temperature.

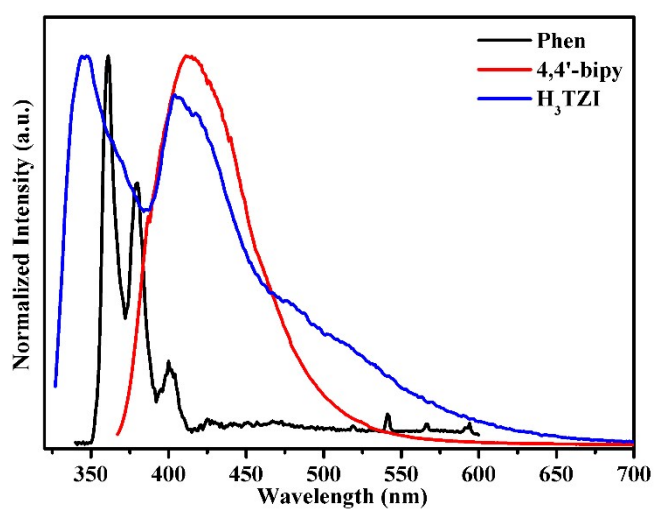

Figure S6. The photoluminescence spectra of ligands Phen, 4,4'-bipy and H<sub>3</sub>TZI when excited at 320 nm.

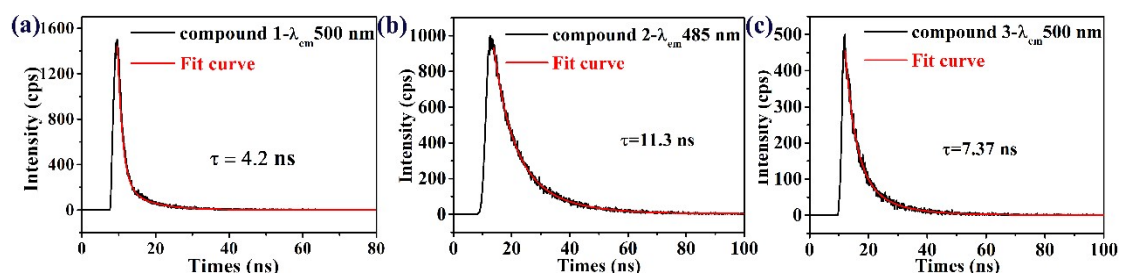

**Figure S7.** Fluorescence decay plot of compound 1-3.

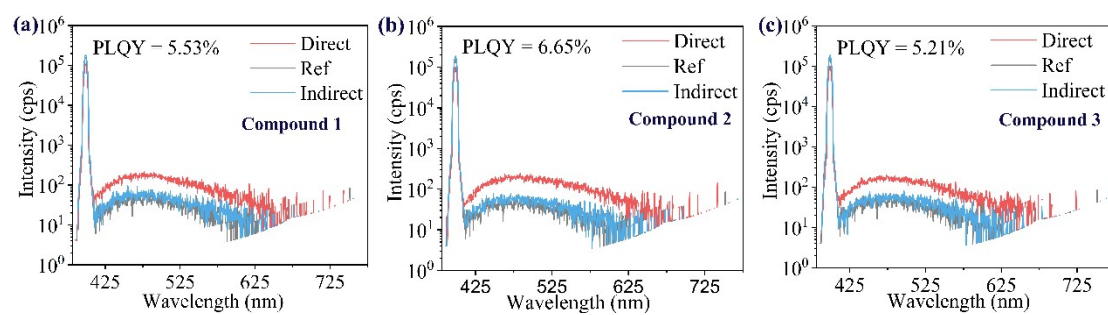

**Figure S8.** Quantum yield plot of compound 1-3 under 400 nm excitation and the emission wavelength is 500 nm, 485 nm and 500 nm, respectively.
